# Supplementary material for: A brainstem circuit for coordinated pain-control
Source: Research Square preprint supplement (doi:10.21203/rs.3.rs-94825/v1), 2020-10-30
Supplement: Supplementary file 1 [file 2cf1c7f9ec8da70cba9778c5.pdf]

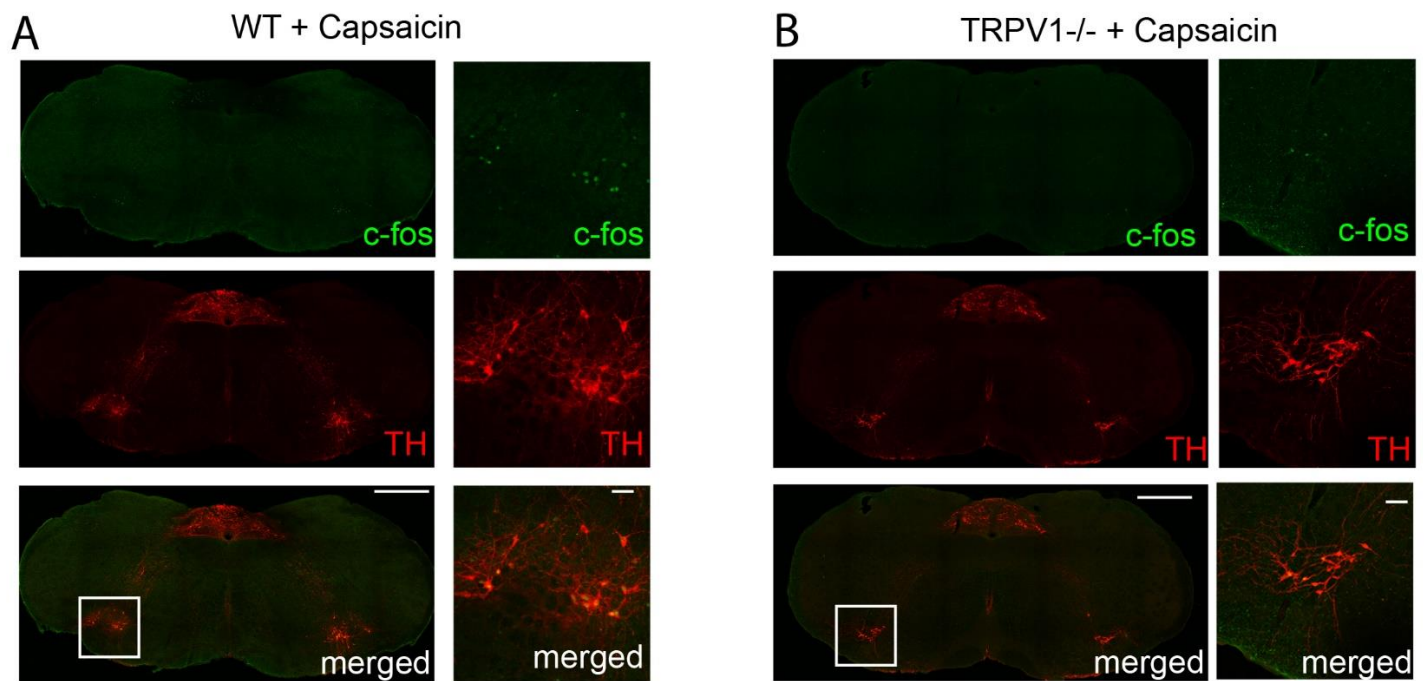

**Fig S1** related to Fig 1. A-C. Representative images of the caudal medulla and magnified ventral lateral medulla regions where tyrosine hydroxylase immune-positive neurons are found (images to the right of the main panels). A. In control mice injected with capsaicin in the hind-paw c-fos expression is found prominently in TH-positive neurons. B. By contrast, in the cVLM of Trpv1 KO mice injected with capsaicin there were very few c-fos-positive neurons. Scale bars: 500  $\mu$ m for coronal sections and 50  $\mu$ m for magnified field images.

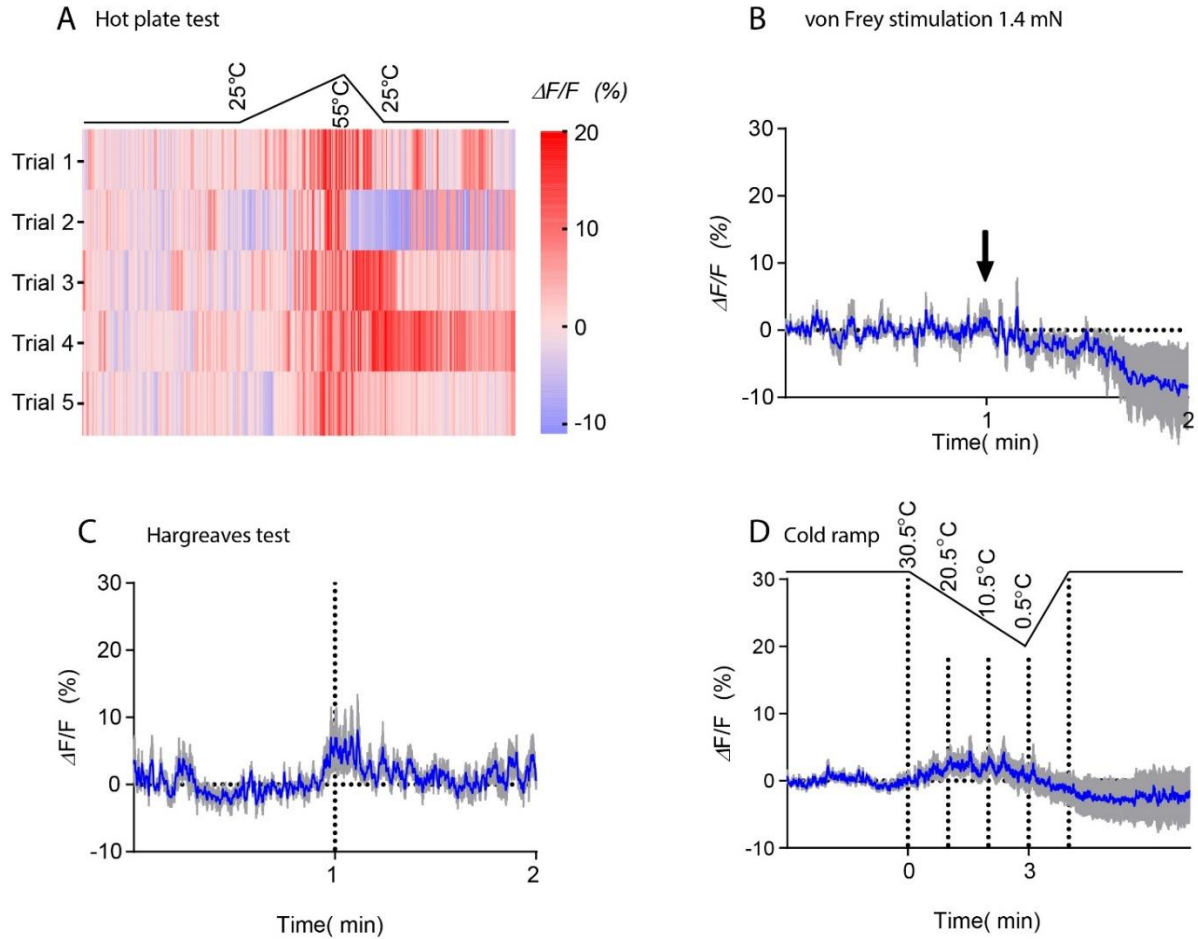

**Fig S2** related to Fig 1. A. Heatmap of intracellular calcium responses of cVLM<sup>TH</sup>-neurons to a heat ramp, using *in vivo* fiber photometry. A Results from a single mouse tested repeatedly with the same heat-ramp challenge, show that these responses are reproducible. B-D. *In vivo* fiber photometry results for mild mechanical (von Frey filament on plantar surface of hind-paw), localized heating (Hargreaves test on plantar surface of hind-paw), and cold (plantar surface of hind-paw) stimulations show, only modest increases in intracellular calcium in cVLM<sup>TH</sup>-neurons; n=6 mice, data are represented as mean results (blue)  $\pm$  SEM (grey).

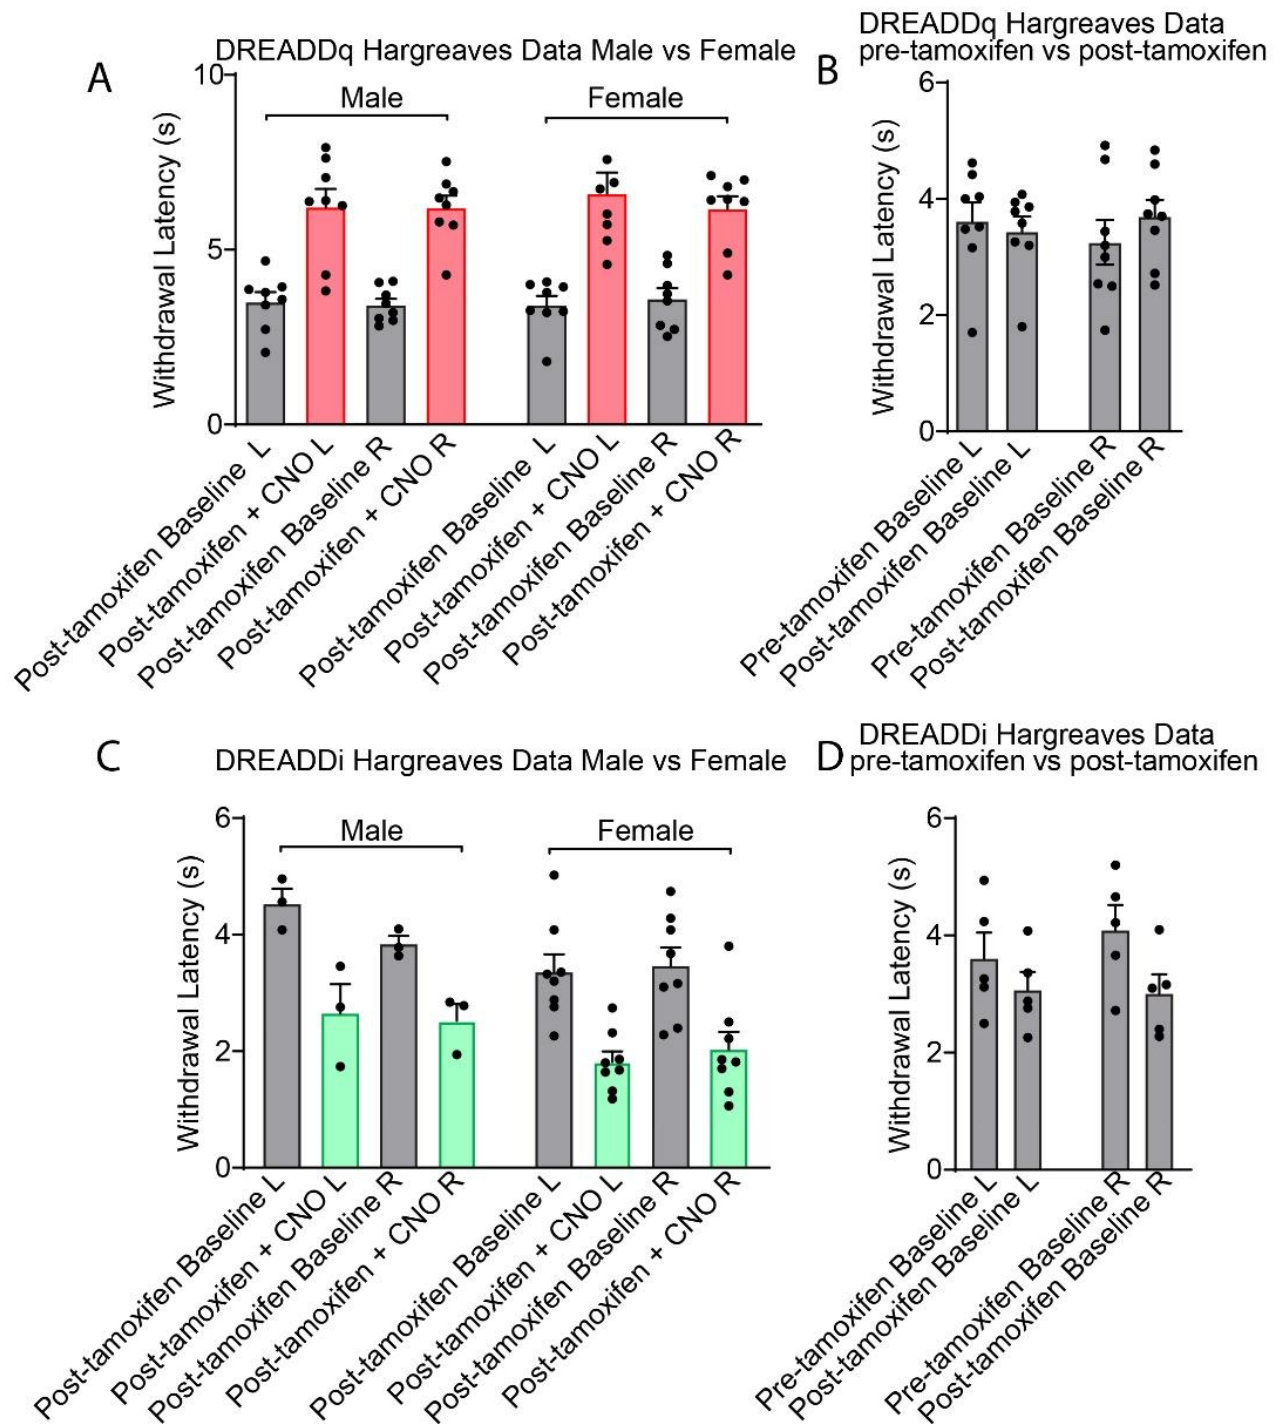

**Fig S3** related to Fig 2. A. For both male and female mice, withdrawal latencies were significantly increased, in Hargreaves tests, after chemogenetic activation of cVLM<sup>TH</sup>-neurons (CNO administration) compared to saline injected mice (L and R indicate left and right hind-paws respectively), n=8 male n=8 female mice,  $p < 0.001$  Student T-test, data represent means  $\pm$  SEM. There were no significant difference in responses between male and female mice,  $p = 0.63$  for L and  $p = 0.95$  for R, Student T-test, data represent means  $\pm$  SEM. B. Hargreaves test responses of mice before and after administration of tamoxifen (to induce translocation of CreERT2 and recombination) were not significantly different, n=8,  $p = 0.42$  for L and  $p = 0.09$  for R, Student T-test, data represent means  $\pm$  SEM. C. For both male and female mice withdrawal latencies were significantly decreased, in Hargreaves tests, after chemogenetic inhibition of cVLM<sup>TH</sup>-neurons (CNO administration) compared to saline injected mice, n=3 male n=8 female mice,  $p < 0.05$  Student paired T-test. There were no significant differences in responses between male and female mice.  $p = 0.09$  for L and  $p = 0.38$  for R. D. Hargreaves test responses of mice before and after administration of tamoxifen. There were no significant differences between treatment groups, n=5,  $p = 0.30$  for L and  $p = 0.08$  for R, Student T-test, data represent means  $\pm$  SEM.

Analysis of effects of stereotaxic injection of AAV-EF1a-flex DREADDq into the cVLM of TH-CreER mice

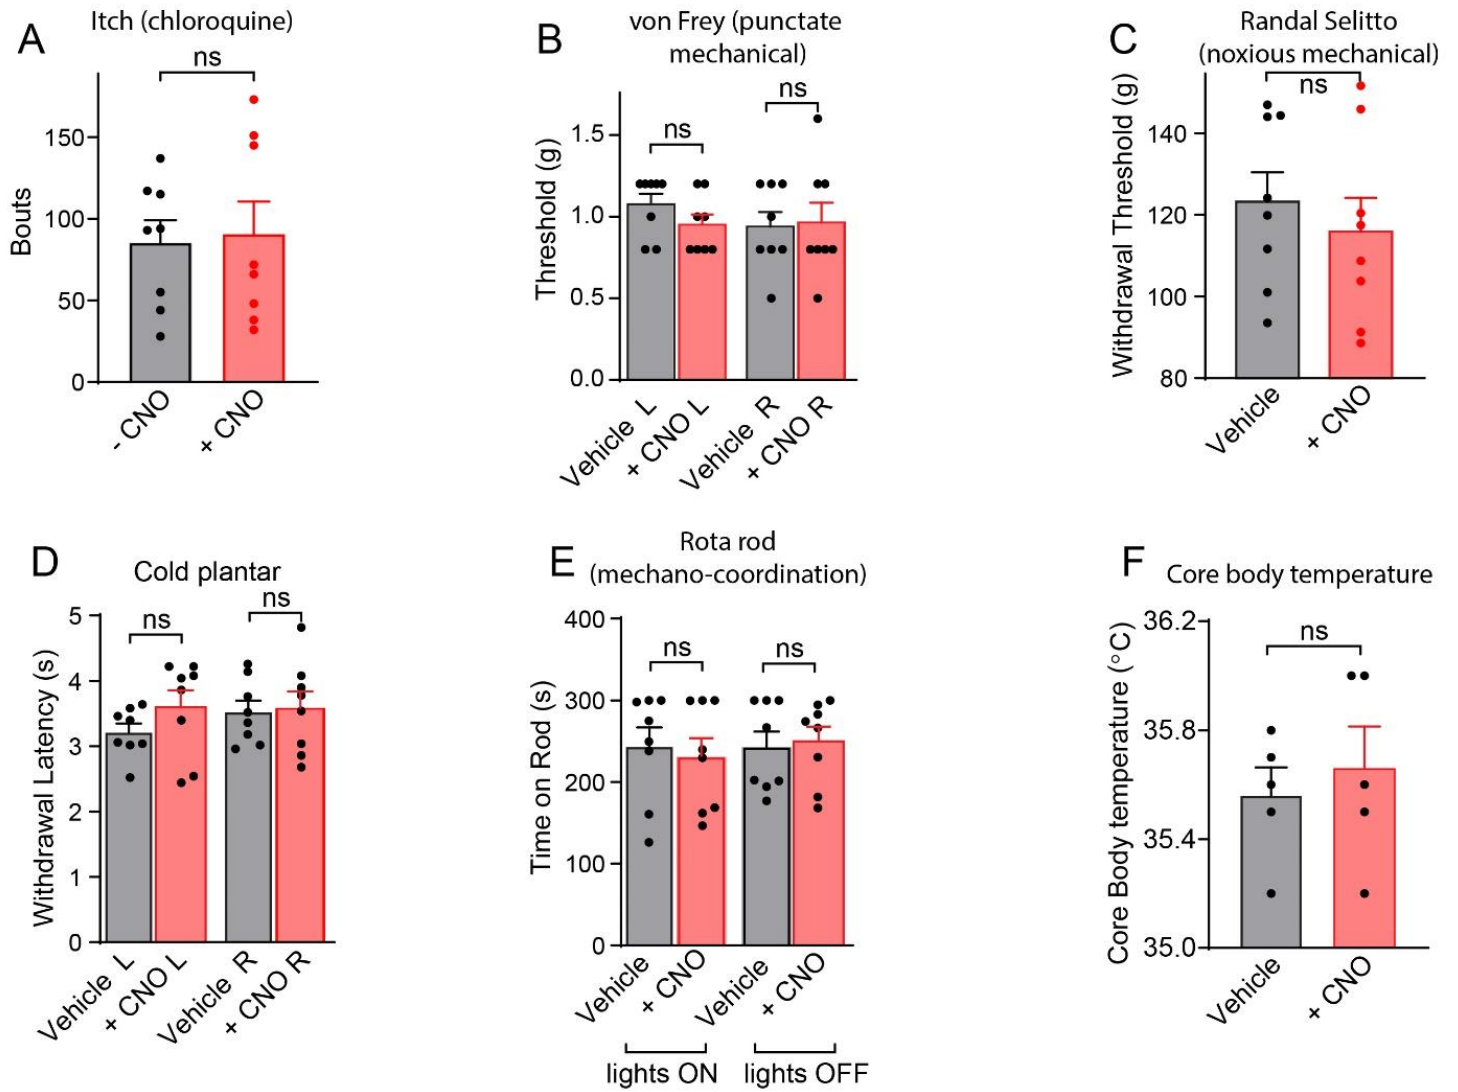

**Fig S4** related to Fig 2. A-F Analysis of behavioral responses in TH-CreER mice injected unilaterally in the cVLM with AAV2-hSyn-DIO-hM3D(Gq)-mCherry and tested in behavioral assays following chemogenetic activation of cVLM<sup>TH</sup>-neurons (CNO). A. Number of scratching bouts over 30 minutes to intradermal injection of chloroquine (200  $\mu$ g) in the nape of the neck was not significantly different between treatment groups ( $\pm$ CNO) n=8 mice, p=0.76, Student T-test, data represent means  $\pm$  SEM. B. Threshold responses to von Frey filament stimulation was not significantly different between treatment groups ( $\pm$ CNO) n=8 mice, p=0.80, Student T-test, data represent means  $\pm$  SEM. C. Mechanical pinch responses (Randal Selitto method) were not significantly different between treatment groups ( $\pm$ CNO) n=8 mice, p=0.47, Student T-test, data represent means  $\pm$  SEM. D. Latencies for withdrawal in plantar reflex responses to cold stimulation were not significantly different between treatment groups ( $\pm$ CNO) n=8 mice, p=0.11, Student T-test, data represent means  $\pm$  SEM. Motor coordination was not significantly different between treatment groups ( $\pm$ CNO) n=8 mice, p=0.43 Student T-test, data represent means  $\pm$  SEM. F. Core body temperature measured with a rectal thermal probe was not significantly different between treatment groups ( $\pm$ CNO) n=5 mice, p=0.58, Student T-test, data represent means  $\pm$  SEM.

Analysis of effects of stereotaxic injection of AAV2-hSyn-DIO-hM4Di into the cVLM of TH-CreER mice

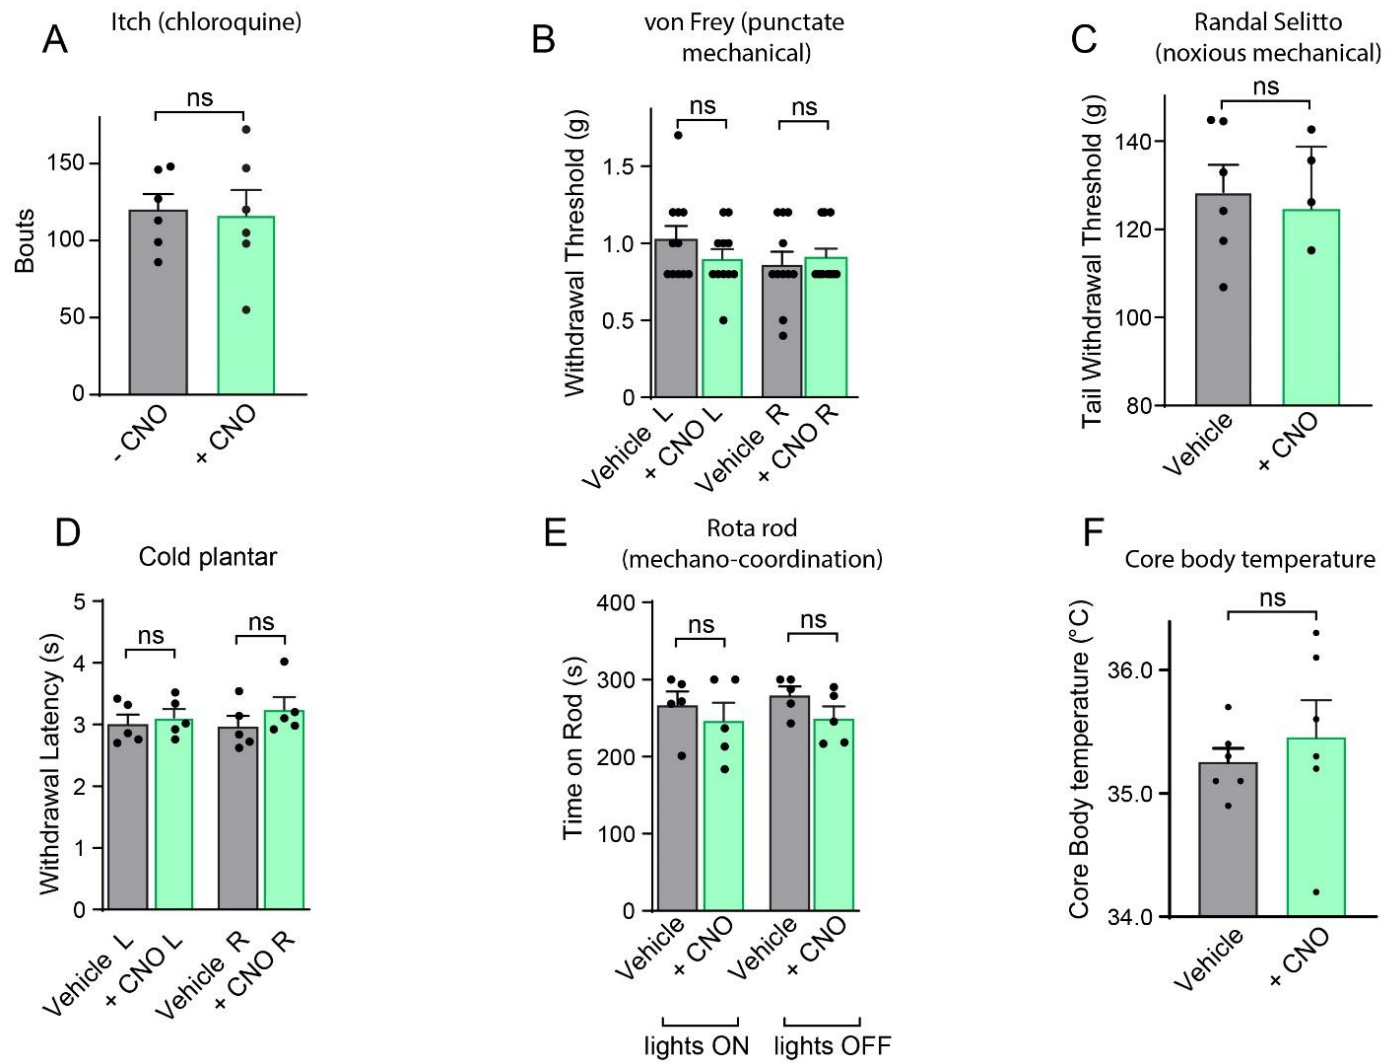

**Fig S5** related to Fig 2. A-F Analysis of behavioral responses in TH-CreER mice injected unilaterally in the cVLM with AAV2-hSyn-DIO-hM4D(Gi)-mCherry and tested in behavioral assays following chemogenetic inhibition of cVLM<sup>TH</sup>-neurons (CNO). A. Number of scratching bouts over 30 minutes to intradermal injection of chloroquine (200 $\mu$ g) in the nape of the neck was not significantly different between treatment groups ( $\pm$ CNO) n=6 mice, p=0.83 Student T-test, data represent means  $\pm$  SEM. B, Threshold responses to von Frey filament stimulation was not significantly different between treatment groups ( $\pm$ CNO) n=11 mice, p=0.30 for L and 0.55 for R. Student T-test, data represent means  $\pm$  SEM. C. Mechanical pinch responses (Randal Selitto method) were not significantly different between treatment groups ( $\pm$ CNO) n=6 mice, p=0.75. Student T-test, data represent means  $\pm$  SEM. D. Latencies for withdrawal in plantar reflex responses to cold stimulation were not significantly different between treatment groups ( $\pm$ CNO) n=5 mice, p=0.64 for L and 0.08 for R. Student T-test, data represent means  $\pm$  SEM. Motor coordination was not significantly different between treatment groups ( $\pm$ CNO) n=5 mice, p=0.13. Student T-test, data represent means  $\pm$  SEM. F. Core body temperature measured with a rectal thermal probe was not significantly different between treatment groups ( $\pm$ CNO) n=6 mice, p=0.41. Student T-test, data represent means  $\pm$  SEM.



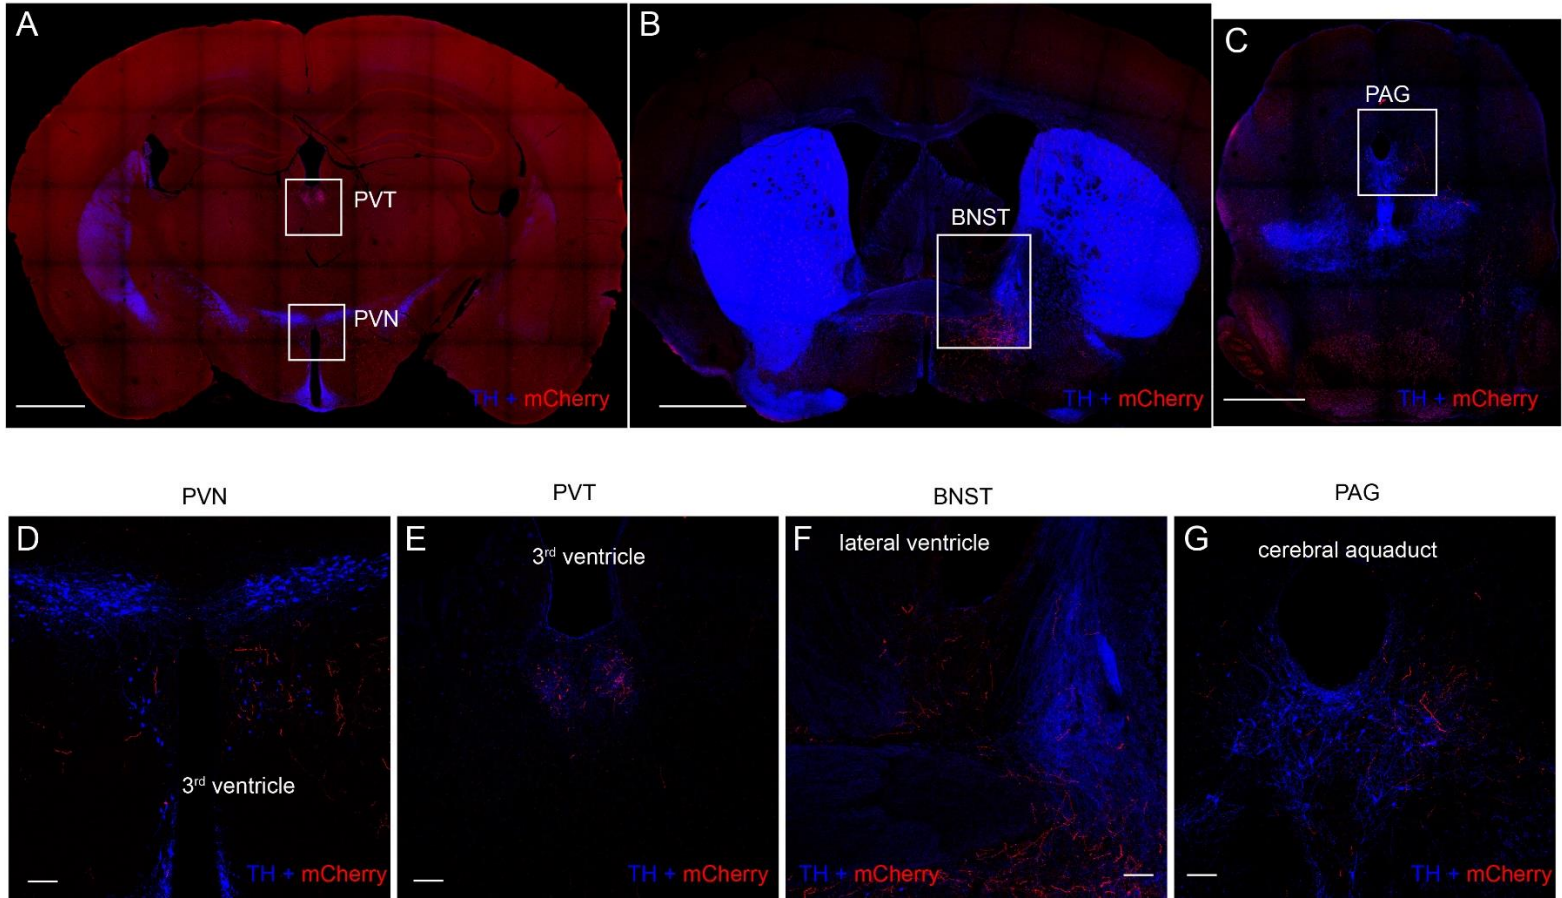

**Fig S6** related to Fig 3. A-G. Representative images of the pattern of fiber projections of TH-Cre mice injected in the cVLM with AAV2-Syn-DIO-TVA-mCherry, showing labeled fibers (red) and TH-staining (blue), n=3 mice. A. Representative image of a coronal section of the midbrain showing cVLM<sup>TH</sup>-neuron projections to the PVT and PVN. B. Section through midbrain showing cVLM<sup>TH</sup>-neuron projections to the BNST. C. Section of the hindbrain showing cVLM<sup>TH</sup>-neuron projections to the PAG. D and E. Magnified view of boxed areas in A. F. Magnified view of boxed areas in B. G. Magnified view of boxed areas in C. Scale bars: 1 mm in A-C and 100  $\mu$ m in D-G.

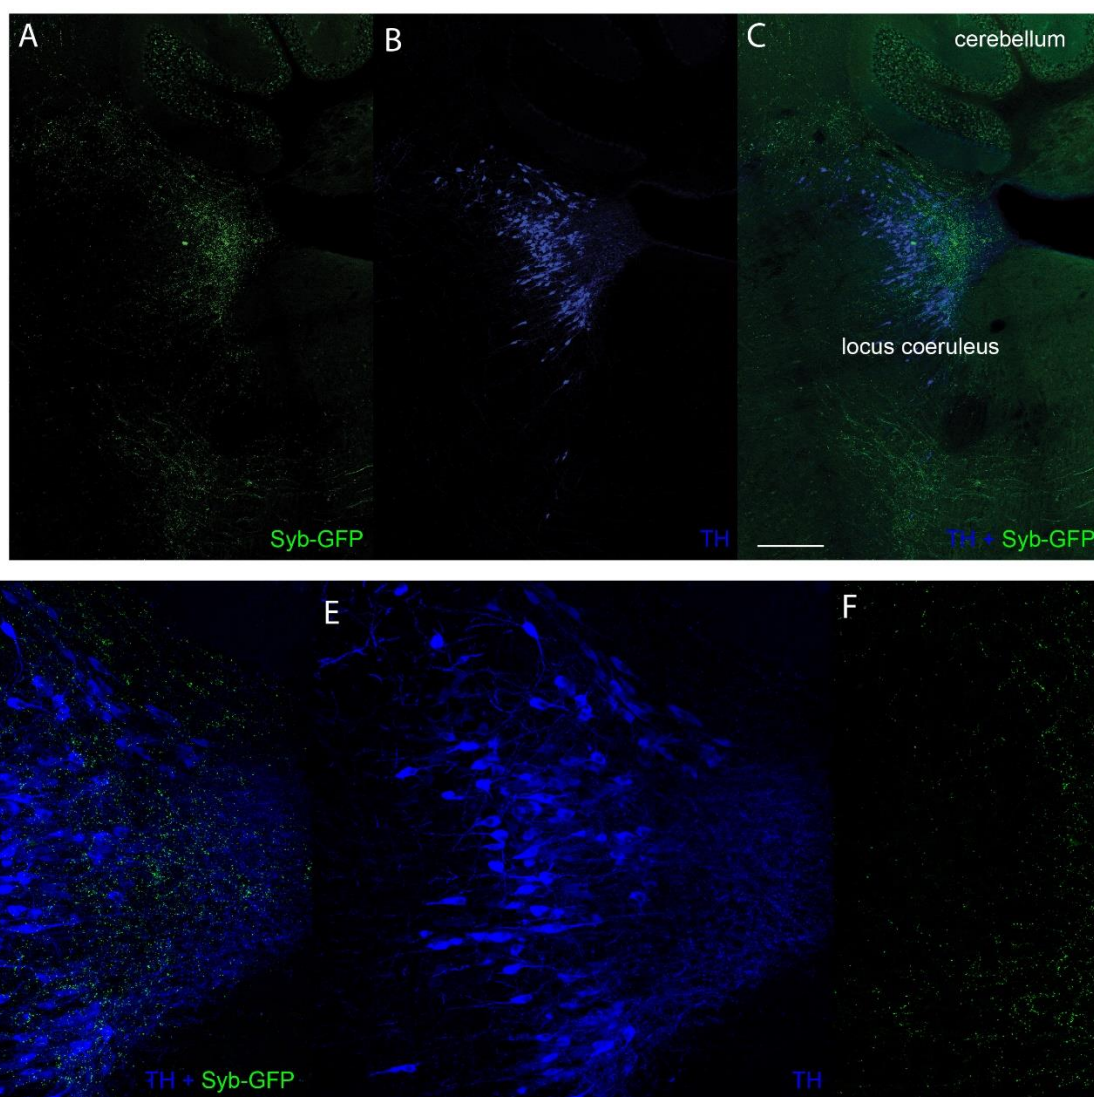

**Fig S7** related to Fig 3. A-F. Representative images of the pattern of fiber projections from TH-Cre mice injected in the cVLM with AAV9-hSyn-DIO-mCherry-2A-SybGFP, showing synaptic boutons (green) on projecting axons and TH-staining of LC-neurons (blue), n=3 mice. A-C. Representative image of a sagittal section of the hindbrain showing cVLM<sup>TH</sup>-neuron projections to the LC. D-F. Magnified view of LC. Scale bars, 500  $\mu$ m in A-C and 50  $\mu$ m in D-F.

Hot plate cVLM-responses with counter stimulus

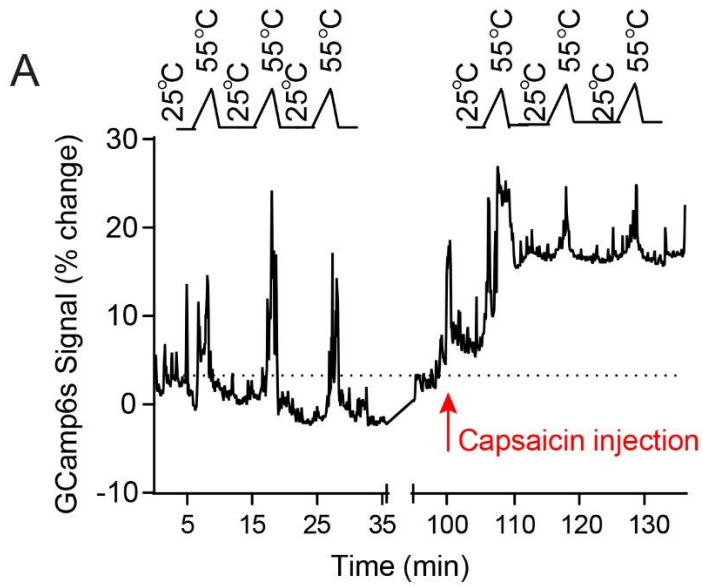

Hot plate behavioral responses

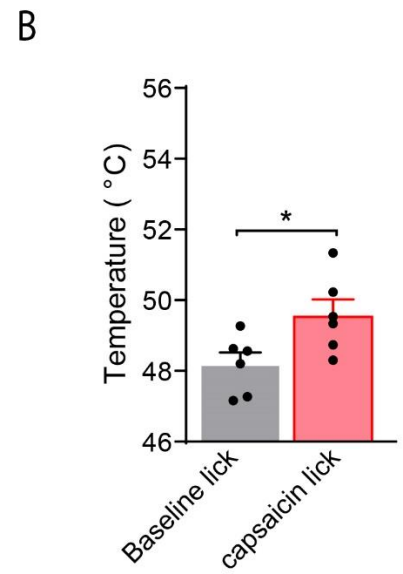

Hot plate cVLM-responses without counter stimulus

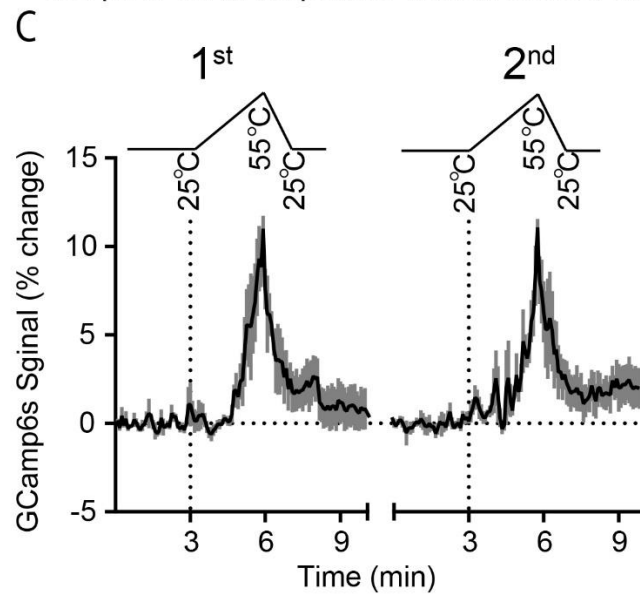

**Fig S8** related to Fig 4. A. Representative example of calcium responses of cVLM<sup>TH</sup>-neurons, measured using *in vivo* fiber photometry, from a single mouse to repeated noxious heat stimulation (on a hot plate; temperature ramps indicated above trace) before and after injection of capsaicin counter-stimulus into the fore paw (indicated with red arrow). A 1-hour rest period was included between naïve and counter-stimulus trials. B. Behavioral responses to heat challenge (heat ramp to 55 °C) on a hot plate before and after injection of capsaicin in the forepaw; latency to first lick (left columns). There was a significant difference between trial groups for first lick ( $\pm$  capsaicin), n=6 mice, p=0.043, paired Student T-test, data represent means  $\pm$  SEM. C. Averaged *in vivo* photometry responses of cVLM<sup>TH</sup>-neurons for three trials (combined and averaged) before and after a 1-hour rest period to heat challenges (3 x heat ramp to 55 °C) on a hot plate, showed that averaged responses were not altered to repeated noxious thermal insult.
